# Supplementary material for: All‐Polymer Solar Cells Based on Fully Conjugated Donor‐Acceptor Block Copolymers with Poly(naphthalene bisimide) Acceptor Blocks: Device Performance and Thin Film Morphology
Source: Hindawi journal article supplement (doi:10.1155/2015/826985), 2015-01-01
Supplement: f1 [file 826985.f1.pdf]

## Supporting Information

# **All-Polymer Solar Cells Based on Fully Conjugated Donor-Acceptor Block Copolymers with Poly(naphthalene bisimide) Acceptor Blocks: Device Performance and Thin Film Morphology**

*Kazuhiro Nakabayashi, and Hideharu Mori*

Department of Polymer Science and Engineering, Graduate School of Science and Engineering,

Yamagata University, 4-3-16, Jonan, Yonezawa 992-8510, Japan

## **Characterization.**

The UV-vis spectra were recorded on a JASCO V-630BIO UV-vis spectrophotometer. Cyclic voltammetry experiments for the polymer thin films were performed on a BAS electrochemical analyzer (model 660C). A three-electrode cell was used with platinum electrodes as both the counter and working electrodes. Silver/silver ion (Ag in 0.1 M AgNO<sub>3</sub> solution) was used as the reference electrode. Ferrocene/Ferrocenium (Fc/Fc<sup>+</sup>) was used as an internal standard. The potential values obtained in reference to Ag/Ag<sup>+</sup> were converted to the values relative to the saturated calomel electrode (SCE). Tapping mode AFM observation was performed with an Agilent AFM 5500, using micro-fabricated cantilevers with a force constant of approximately 34 N/m. The samples for AFM measurements were prepared by the spin-coating of P3HT:P2 solutions (10 mg/mL in dichlorobenzene) onto silicon wafer and dried under ambient condition. GIWAXS experiments were conducted at the Spring-8 on beamline BL19B2. The sample was irradiated at a fixed incident angle on the order of 0.12° through a Hubber diffractometer with an X-ray energy of 12.39 keV ( $\lambda = 1 \text{ \AA}$ ), and the GIXD patterns were recorded with a 2-D image detector (Pilatus 300K). The samples for GIWAXS measurements were prepared by the drop-casting of polymer solutions onto silicon wafer.

## **All-polymer solar cell fabrication with P3HT:PNBI system.**

The typical procedure of ITO/PEDOT:PSS/P3HT:PNBI/Ca/Al architecture is as follows: Commercially available prepatterned 15  $\Omega/\square$  sheet resistance ITO substrates were cleaned and

plasma-etched. Then PEDOT:PSS aqueous solution was spin-coated at 4000 rpm for 40 s, and subsequently annealed under flowing nitrogen at 120 °C for 10 min. Substrates were allowed to cool under nitrogen atmosphere and then transferred to a glovebox. P3HT:PNBI blend dichlorobenzene solution was spin-coated at 700 rpm for 90 s, and the active layer was annealed at 200 °C for 15 min. The blend solution that 5 mg of each polymer dissolved in 1 mL of dichlorobenzene (1:1 by weight, conc. = 10 mg/mL) was prepared in a glovebox. Then the top electrode consisted of Ca interlayer (20 nm) and Al electrode (80 nm) was vacuum-deposited. The *J-V* characteristics of the devices were measured by using a direct-current voltage and a current source/monitor (Bunko-Keiki, BSO-X500L) in nitrogen atmosphere under AM1.5G simulated solar light at 100 mWcm<sup>-2</sup>. The light intensity was corrected with a calibrated silicon photodiode reference cell (Bunko-Keiki, BS-520).

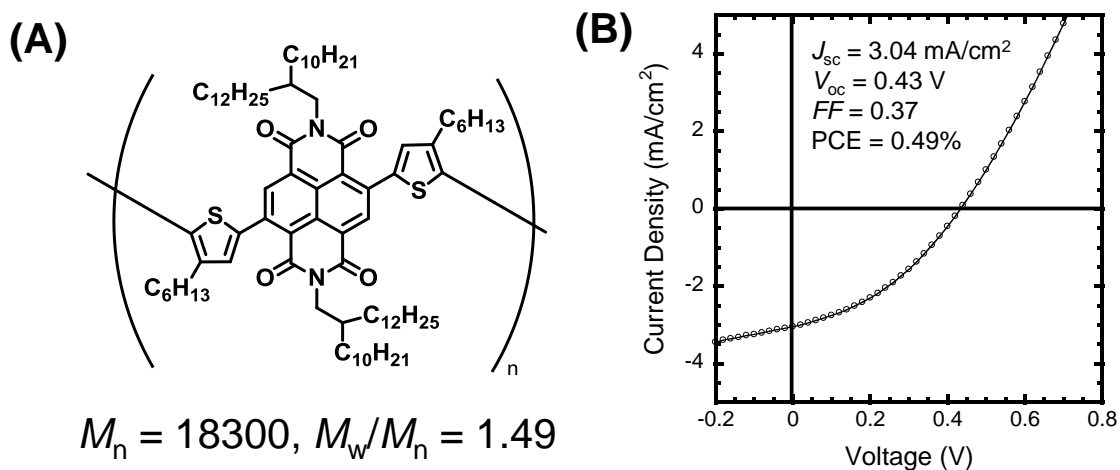

**Figure S1.** (A) Structural information of PNBI and (B) *J-V* characteristics of P3HT:PNBI system under AM1.5G (100 mW/cm<sup>2</sup>) illumination.

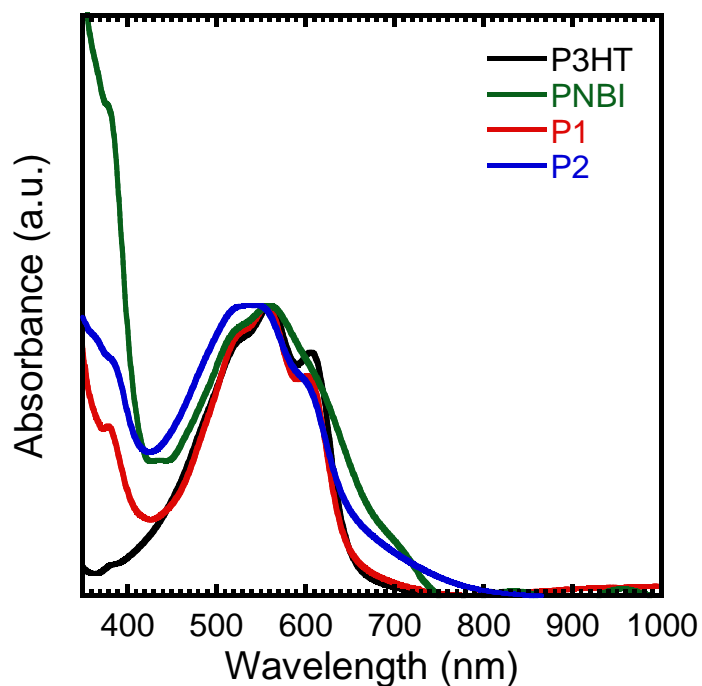

**Figure S2.** UV-vis absorption spectra of P3HT, PNBI, P1, and P2 thin films.

**Table S1.** Optical and electrochemical properties of PNBI.

|      | Optical properties    |                                      | Electrochemical properties                       |                                                 |                        |                        |
|------|-----------------------|--------------------------------------|--------------------------------------------------|-------------------------------------------------|------------------------|------------------------|
|      | $\lambda_{\max}$ (nm) | $E_g^{\text{opt}}$ (eV) <sup>a</sup> | $E_{\text{red}}^{\text{onset}}$ (V) <sup>b</sup> | $E_{\text{ox}}^{\text{onset}}$ (V) <sup>b</sup> | HOMO (eV) <sup>c</sup> | LUMO (eV) <sup>d</sup> |
| PNBI | 383, 561              | 1.65                                 | -0.1                                             | -                                               | -                      | -4.30                  |
| P1   | 379, 557, 603         | 1.65                                 | -0.13                                            | 1.17                                            | -5.57                  | -4.27                  |
| P2   | 391, 521              | 1.46                                 | -0.18                                            | 1.20                                            | -5.60                  | -4.22                  |

<sup>a</sup>Calculated from  $E_g^{\text{opt}} = 1240/\lambda_{\text{edge}}$  (eV). <sup>b</sup>vs SCE. <sup>c</sup>HOMO was calculated from  $\text{HOMO} = -(E_{\text{ox}}^{\text{onset}} + 4.4)$  (eV). <sup>d</sup>LUMO was calculated from  $\text{LUMO} = -(E_{\text{red}}^{\text{onset}} + 4.4)$  (eV).

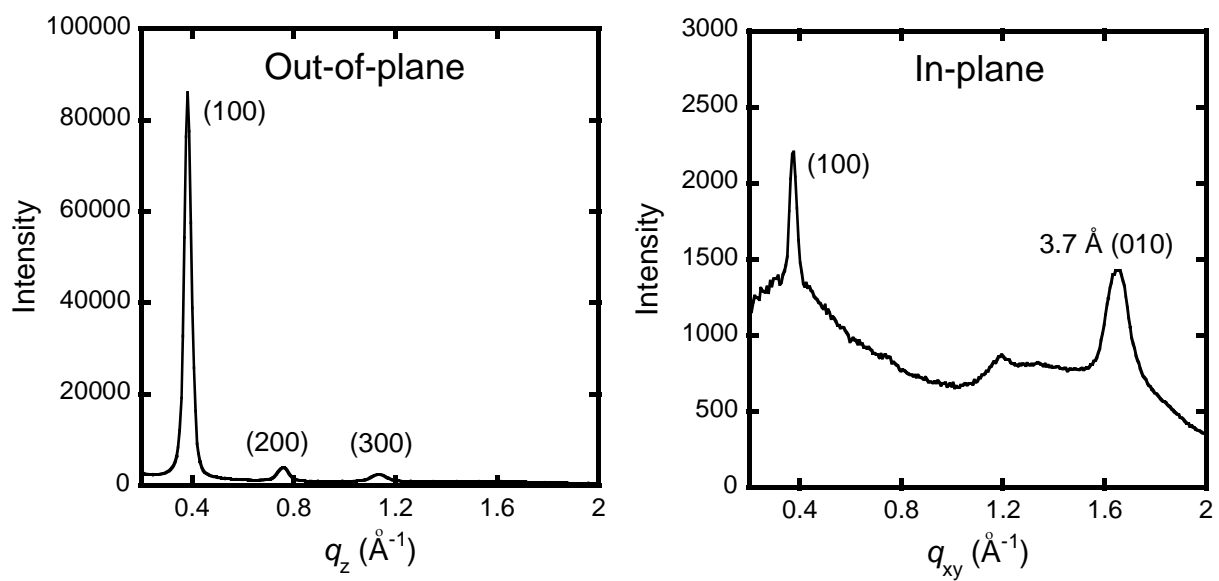

**Figure S3.** GIWAXS profiles of thermal-annealed P3HT homopolymer film.
